# Supplementary material
Source: PubMed Central journal article supplement (PMC3691436)
Supplement: 12248_2013_9493_MOESM6_ESM.pdf [file 12248_2013_9493_MOESM6_ESM.pdf]

**Suppl. Table 4**

| Group          | Animal | Week of Age and Body weight (g)          |      |      |      |      |      |      |      |      |      |      |      |      |      |      |      |      | GU Weight | GUW/BW (%) |
|----------------|--------|------------------------------------------|------|------|------|------|------|------|------|------|------|------|------|------|------|------|------|------|-----------|------------|
|                |        | 8                                        | 9    | 10   | 11   | 12   | 13   | 14   | 15   | 16   | 17   | 18   | 19   | 20   | 21   | 22   | 23   | 24   |           |            |
|                |        | <b>AIN-76A diet</b>                      |      |      |      |      |      |      |      |      |      |      |      |      |      |      |      |      |           |            |
| <b>Control</b> | 18.0   | 23.5                                     | 25.1 | 26.2 | 27.1 | 29.3 | 29.9 | 31.2 | 31.3 | 32.1 | 31.8 | 31   | 31.5 | 32.1 | 33   | 33.5 | 34   | 33.9 | 0.9       | 2.6549     |
|                | 18.1R  | 24.1                                     | 24.8 | 25.6 | 26.5 | 27.6 | 28.3 | 29.4 | 30.5 | 31.2 | 32.3 | 33.1 | 33.5 | 33.4 | 34.1 | 33.9 | 33.5 | 32.5 | 1.84      | 5.6615     |
|                | 22.1R  | 20.6                                     | 21.7 | 22.5 | 23.5 | 23.4 | 24.3 | 24.9 | 25.5 | 26.2 | 27.6 | 28.4 | 29.3 | 29.7 | 29.4 | 26.4 | 27   | 27.3 | 0.77      | 2.8205     |
|                | 22.B   | 20.1                                     | 21.1 | 21.5 | 21.9 | 23.5 | 23.6 | 24.2 | 24.1 | 24.7 | 24.5 | 25.5 | 25.9 | 26.4 | 27.6 | 30.2 | 28.9 | 27.6 | 3.84      | 13.913     |
|                | 24.1R  | 20.5                                     | 21.4 | 22.1 | 22.5 | 22.9 | 24.5 | 25.5 | 26.3 | 26.5 | 25.7 | 25.4 | 25.1 | 26.5 | 24.5 | 24.8 | 25.1 | 24.8 | 0.85      | 3.4274     |
|                | 24.B   | 17.3                                     | 18.9 | 19.3 | 20.2 | 21.1 | 21.2 | 22.1 | 22.7 | 22.7 | 23.1 | 23.7 | 24.8 | 25.4 | 24.1 | 26.3 | 27.7 | 27.5 | 3.2       | 11.636     |
|                | 27.0   | 23.2                                     | 22.9 | 23.2 | 23.8 | 24.7 | 25.2 | 25.3 | 25.6 | 25.8 | 26.1 | 26.8 | 26.9 | 28.2 | 28.5 | 29.3 | 29.8 | 30.1 | 1.69      | 5.6146     |
|                | 27.1R  | 19.5                                     | 20.1 | 21.3 | 22.6 | 21.9 | 23.2 | 23.9 | 24.2 | 24.7 | 25.2 | 25.6 | 25.4 | 26.1 | 25.8 | 27.5 | 27.8 | 27.4 | 1.28      | 4.6715     |
|                | 27.1L  | 20.1                                     | 20.8 | 21.1 | 21.6 | 22.9 | 22.2 | 23.3 | 24.1 | 25.4 | 25.6 | 25.6 | 25.8 | 25.9 | 26.2 | 26.6 | 27.4 | 28.1 | 1.21      | 4.306      |
|                | 27.2R  | 18.9                                     | 19.5 | 20.2 | 20.9 | 21.9 | 21.5 | 22.1 | 22.5 | 23.6 | 24.1 | 24.3 | 24.2 | 24.3 | 25   | 25   | 26.2 | 27.2 | 0.51      | 1.875      |
|                | 28.0   | 21.2                                     | 22.1 | 23.5 | 24.1 | 24.3 | 24.3 | 25.7 | 26.9 | 30.4 | 31   | 31.8 | 33.5 | 34.7 | 35.1 | 35.7 | 34.9 | 34.5 | 1.71      | 4.9565     |
|                | 28.1R  | 20.1                                     | 20.5 | 21.4 | 21.8 | 22.1 | 21.7 | 22.6 | 22.9 | 24.6 | 24.5 | 25.3 | 26.2 | 26.8 | 26.8 | 27.3 | 29   | 29.5 | 3.04      | 10.305     |
|                | 28.1L  | 21.5                                     | 21.9 | 22.3 | 22.8 | 23.4 | 23.5 | 24.5 | 25.8 | 28.4 | 29.7 | 30.4 | 31.6 | 32.7 | 33.4 | 33.5 | 34.3 | 34.6 | 1.52      | 4.3931     |
|                | 29.0   | 19.7                                     | 20.5 | 21.6 | 22   | 22.4 | 22.6 | 23.6 | 24.2 | 24.1 | 24.6 | 25.4 | 25.2 | 25.8 | 26.3 | 27.5 | 27.8 | 28.3 | 3.38      | 11.943     |
|                | 29.1R  | 19.8                                     | 20.1 | 21.2 | 22.2 | 23.2 | 23.2 | 22.9 | 23.8 | 23.5 | 23.8 | 24.9 | 25.8 | 25.5 | 25.9 | 26.8 | 27.5 | 27.3 | 2.92      | 10.696     |
|                | 30.0   | 19.2                                     | 19.7 | 20.4 | 21.4 | 22.2 | 22.6 | 23.2 | 23.3 | 23.9 | 24.2 | 24.8 | 24.5 | 24.6 | 24.7 | 24.6 | 25.1 | 24.8 | 1.7       | 6.8548     |
| 30.B           | 22.5   | 22.6                                     | 23.1 | 23.3 | 24.7 | 25   | 25.8 | 25.9 | 25.6 | 27.5 | 27.9 | 27.7 | 27.5 | 27.8 | 28   | 27.9 | 28.1 | 0.52 | 1.8505    |            |
| 30.2R          | 22.5   | 23.6                                     | 23.9 | 24.9 | 27   | 25   | 25.6 | 25.6 | 25.9 | 26.7 | 27   | 26.9 | 26.5 | 26.9 | 26.6 | 27.1 | 26.8 | 0.82 | 3.0597    |            |
| 31.1L          | 19     | 20.5                                     | 22.3 | 24.5 | 25.5 | 26.2 | 26.6 | 27.5 | 28.4 | 28.1 | 28.9 | 29.7 | 30.9 | 30.6 | 31.2 | 32   | 29.5 | 0.65 | 2.2034    |            |
|                |        | <b>1% DIM supplement in AIN-76A diet</b> |      |      |      |      |      |      |      |      |      |      |      |      |      |      |      |      |           |            |
| <b>D-G1</b>    | 52.0   | 17.6                                     | 19.7 | 19.5 | 20.9 | 21.6 | 22.1 | 22.4 | 22.7 | 22.3 | 22.4 | 22.4 | 23.5 | 23.2 | 23   | 23.6 | 24.2 | 25.4 | 0.6       | 2.3622     |
|                | 52.1L  | 17.5                                     | 18.5 | 20   | 20.1 | 20.3 | 21.4 | 21.3 | 22.2 | 22.5 | 23.3 | 23.4 | 23.5 | 23.6 | 24.1 | 24.6 | 24.8 | 25.4 | 0.65      | 2.5591     |
|                | 54.0   | 17.9                                     | 18.5 | 19.2 | 21.1 | 20.8 | 22.5 | 22.3 | 21.8 | 23.4 | 23   | 23.1 | 23.3 | 24   | 23.8 | 24.5 | 25.2 | 26.1 | 0.28      | 1.0728     |
|                | 54.1R  | 20.3                                     | 20.5 | 21.1 | 21.6 | 22   | 22.4 | 22.9 | 23.4 | 23.6 | 23.1 | 24.1 | 24.6 | 25.1 | 24.8 | 25.2 | 25.5 | 25.8 | 0.38      | 1.4729     |
|                | 54.1L  | 20.9                                     | 20.8 | 21.2 | 21.4 | 21.3 | 22.2 | 22.3 | 23   | 22.8 | 23   | 22.9 | 23.5 | 23.8 | 23.5 | 24.2 | 24.5 | 24.3 | 0.77      | 3.1687     |
|                | 70.1L  | 21.3                                     | 22.7 | 22.8 | 23   | 23.1 | 23.3 | 23.5 | 23.8 | 22.9 | 23.2 | 23.5 | 23.9 | 24.2 | 24.2 | 25.1 | 24.8 | 24.8 | 0.1       | 0.4032     |
|                | 70.B   | 20.3                                     | 20.2 | 20.3 | 21.6 | 22   | 22.6 | 22.6 | 22.9 | 23.6 | 23.7 | 23.6 | 23.9 | 24.5 | 24.1 | 25   | 25.3 | 25.5 | 0.28      | 1.098      |
|                | 71.0   | 21.4                                     | 20.3 | 22   | 22.1 | 21.8 | 22.5 | 22.7 | 23.2 | 22.9 | 23.6 | 24.1 | 23.9 | 24.3 | 25.1 | 25.3 | 25.8 | 26.1 | 0.28      | 1.0728     |
|                | 71.1R  | 21.4                                     | 20.5 | 20.7 | 21.5 | 22.1 | 22.3 | 22.8 | 23.1 | 23.5 | 24.1 | 23.8 | 24.5 | 24.7 | 25.1 | 25.6 | 25.9 | 26.5 | 0.33      | 1.2453     |

**Suppl. Table 4 (count.)**

| Group       | Animal | Week of Age and Body weight (g) |      |      |      |      |                                   |      |      |      |      |      |      |      |      |      |      |      | GU Weight | GUW/BW (%) |
|-------------|--------|---------------------------------|------|------|------|------|-----------------------------------|------|------|------|------|------|------|------|------|------|------|------|-----------|------------|
|             |        | 8                               | 9    | 10   | 11   | 12   | 13                                | 14   | 15   | 16   | 17   | 18   | 19   | 20   | 21   | 22   | 23   | 24   |           |            |
|             |        | AIN-76A diet                    |      |      |      |      | 1% DIM supplement in AIN-76A diet |      |      |      |      |      |      |      |      |      |      |      |           |            |
| <b>D-G2</b> | 72.0   | 19.4                            | 20.5 | 23.2 | 23.5 | 23.2 | 22.8                              | 23.4 | 24.1 | 24.6 | 24.8 | 25.1 | 25.4 | 26.1 | 25.8 | 25.7 | 26.1 | 25.9 | 0.33      | 1.2741     |
|             | 72.1R  | 21.7                            | 22.2 | 22.8 | 22.9 | 23   | 22.2                              | 22.8 | 22.7 | 23.5 | 23.8 | 23.9 | 24.3 | 24.5 | 25.1 | 24.8 | 25.5 | 25.6 | 0.48      | 1.875      |
|             | 72.1L  | 18.9                            | 19.2 | 20.3 | 21.5 | 22.2 | 21.8                              | 22.3 | 23.1 | 23.4 | 24.1 | 23.8 | 24.5 | 24.9 | 24.5 | 25.3 | 25.7 | 26.1 | 0.55      | 2.1073     |
|             | 75.1L  | 20.4                            | 21.4 | 21.6 | 22   | 22.4 | 22.1                              | 23   | 23.5 | 24.5 | 24.8 | 24.3 | 24.6 | 24.8 | 25.1 | 25.3 | 24.9 | 25.6 | 0.6       | 2.3438     |
|             | 75.B   | 19.8                            | 19.9 | 21.2 | 21.5 | 22   | 22.2                              | 22.9 | 23.1 | 23.9 | 24.2 | 24.8 | 24.5 | 25.1 | 25.6 | 26.5 | 26.7 | 26.5 | 0.55      | 2.0755     |
|             | 75.2R  | 18.4                            | 21   | 21.3 | 22.4 | 22.5 | 22.8                              | 23.6 | 23.3 | 22.7 | 22.8 | 23.2 | 24.1 | 24.3 | 24.5 | 25.1 | 25.5 | 25.8 | 0.53      | 2.0543     |
|             | 77.0   | 19.6                            | 20.1 | 20.3 | 21.2 | 22   | 22.5                              | 23.1 | 23.6 | 23.8 | 23.9 | 24.2 | 24.8 | 25.1 | 24.9 | 25.4 | 25.8 | 25.6 | 0.48      | 1.875      |
|             | 77.1L  | 18.9                            | 19.5 | 20.1 | 21.5 | 22.2 | 22.3                              | 23.1 | 22.8 | 23.5 | 23.8 | 23.7 | 24.6 | 24.9 | 25.3 | 26.4 | 26.5 | 25.8 | 0.37      | 1.4341     |
